# Supplementary material for: Differential knockdown of TGF-β ligands in a three-dimensional co-culture tumor- stromal interaction model of lung cancer
Source: PubMed Central journal article supplement (PMC4132906; doi:10.1186/1471-2407-14-580), 2014-08-09

## Supplementary Figure 3

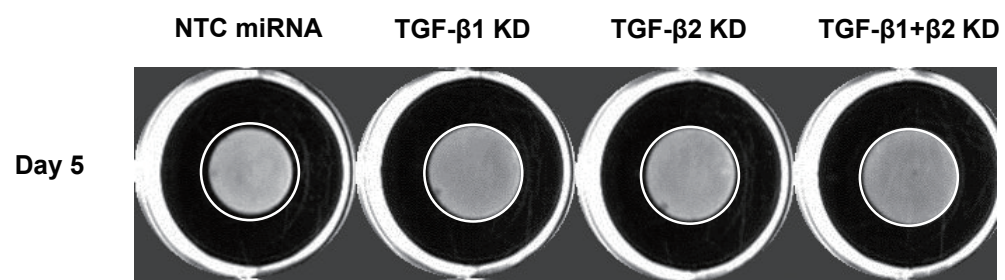

Supplement: 12885_2014_4753_MOESM6_ESM.pdf [file 12885_2014_4753_MOESM6_ESM.pdf]
